# Supplementary material for: Genetic Susceptibility to Insulin Resistance and Its Association with Estimated Longevity in the Hungarian General and Roma Populations
Source: MDPI journal article supplement (doi:10.3390/biomedicines10071703), 2022-07-14
Supplement: s1 [file s1]

(A)

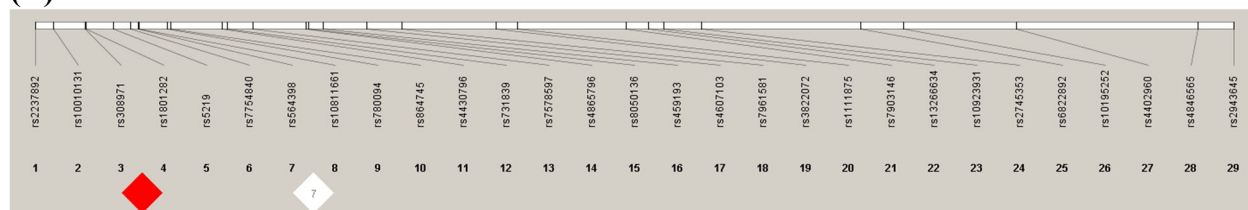

(B)

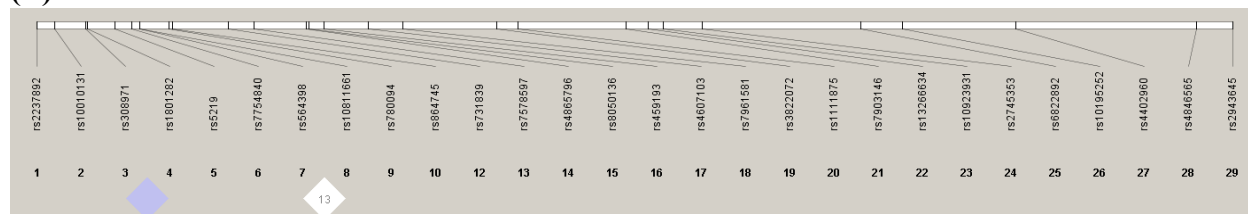

**Supplementary Figure S1.** Linkage disequilibrium map of observed single nucleotide polymorphisms in the Hungarian general (A) and Roma (B) populations.
