# Supplementary material for: Genetic Susceptibility to Insulin Resistance and Its Association with Estimated Longevity in the Hungarian General and Roma Populations
Source: MDPI journal article supplement (doi:10.3390/biomedicines10071703), 2022-07-14
Supplement: s1 [file s1]

**Supplementary Table S1.** List of SNPs (from the lowest to the highest  $p$  value) used for GRS optimization and their effect on the strength of association (expressed as change in  $p$  value and R square) with HOMA—IR by adjusted (for ethnicity, sex, age, BMI, and treatments) regression models.

| No. | SNP        | Gene               | $p$ value | R square | Delta $p$ value | Delta R square | Included / excluded |
|-----|------------|--------------------|-----------|----------|-----------------|----------------|---------------------|
| 1   | rs7961581  | <i>TSPAN8</i>      | 1.37E-03  | 0.2489   | ——              | ——             | Included            |
| 2   | rs1801282  | <i>PPARG</i>       | 1.02E-04  | 0.2541   | 1.27E-03        | -5.24E-03      | Included            |
| 3   | rs6822892  | <i>PDGFC</i>       | 6.00E-05  | 0.2552   | 4.20E-05        | -1.07E-03      | Included            |
| 4   | rs13266634 | <i>SLC30A8</i>     | 7.00E-06  | 0.2596   | 5.30E-05        | -4.43E-03      | Included            |
| 5   | rs4430796  | <i>HNF1B</i>       | 8.88E-07  | 0.2638   | 6.11E-06        | -4.16E-03      | Included            |
| 6   | rs10010131 | <i>WFS1</i>        | 1.63E-07  | 0.2672   | 7.25E-07        | -3.46E-03      | Included            |
| 7   | rs7903146  | <i>TCF7L2</i>      | 2.05E-07  | 0.2668   | -4.22E-08       | 4.70E-04       | Excluded            |
| 8   | rs5219     | <i>KCNJ11</i>      | 3.66E-07  | 0.2656   | -2.03E-07       | 1.65E-03       | Excluded            |
| 9   | rs731839   | <i>PEPD</i>        | 7.00E-06  | 0.2595   | -6.84E-06       | 7.77E-03       | Excluded            |
| 10  | rs459193   | <i>C5orf67</i>     | 6.89E-08  | 0.2690   | 9.42E-08        | -1.76E-03      | Included            |
| 11  | rs4402960  | <i>IGF2BP2</i>     | 3.50E-08  | 0.2704   | 3.39E-08        | -1.38E-03      | Included            |
| 12  | rs308971   | <i>SYN2</i>        | 1.24E-08  | 0.2725   | 2.26E-08        | -2.11E-03      | Included            |
| 13  | rs10811661 | <i>CDKN2B-AS1</i>  | 1.61E-08  | 0.2720   | -3.68E-09       | 5.28E-04       | Excluded            |
| 14  | rs4607103  | <i>ADAMTS9-AS2</i> | 8.40E-09  | 0.2733   | 4.01E-09        | -7.95E-04      | Included            |
| 15  | rs7754840  | <i>CDKAL1</i>      | 4.00E-09  | 0.2748   | 4.40E-09        | -1.51E-03      | Included            |
| 16  | rs3822072  | <i>FAM13A</i>      | 4.68E-09  | 0.2745   | -6.80E-10       | 3.19E-04       | Excluded            |
| 17  | rs7578597  | <i>THADA</i>       | 2.23E-09  | 0.2760   | 1.77E-09        | -1.19E-03      | Included            |
| 18  | rs1111875  | <i>HHEX</i>        | 1.91E-09  | 0.2763   | 3.20E-10        | -3.14E-04      | Included            |
| 19  | rs2943645  | <i>NYAP2</i>       | 5.57E-09  | 0.2741   | -3.65E-09       | 2.17E-03       | Excluded            |
| 20  | rs780094   | <i>GCKR</i>        | 2.35E-09  | 0.2759   | -4.36E-10       | 4.17E-04       | Excluded            |
| 21  | rs4846565  | <i>LYPLAL1-AS1</i> | 3.14E-09  | 0.2753   | -1.22E-09       | 1.00E-03       | Excluded            |
| 22  | rs10195252 | <i>COBLL1</i>      | 1.05E-08  | 0.2728   | -8.59E-09       | 3.46E-03       | Excluded            |
| 23  | rs10923931 | <i>NOTCH2</i>      | 3.93E-09  | 0.2748   | -2.02E-09       | 1.46E-03       | Excluded            |
| 24  | rs8050136  | <i>FTO</i>         | 3.35E-09  | 0.2751   | -1.44E-09       | 1.14E-03       | Excluded            |
| 25  | rs4865796  | <i>ARL15</i>       | 1.88E-09  | 0.2763   | 2.79E-11        | -3.00E-05      | Included            |
| 26  | rs864745   | <i>JAZF1</i>       | 1.13E-09  | 0.2774   | 7.59E-10        | -1.05E-03      | Included            |
| 27  | rs564398   | <i>CDKN2B-AS1</i>  | 2.05E-09  | 0.2761   | -9.28E-10       | 1.22E-03       | Excluded            |
| 28  | rs2745353  | <i>RSPO3</i>       | 1.27E-08  | 0.2724   | -1.15E-08       | 4.92E-03       | Excluded            |
| 29  | rs2237892  | <i>KCNQ1</i>       | 4.37E-09  | 0.2746   | -3.24E-09       | 2.75E-03       | Excluded            |
