# Supplementary material for: Genetic Susceptibility to Insulin Resistance and Its Association with Estimated Longevity in the Hungarian General and Roma Populations
Source: MDPI journal article supplement (doi:10.3390/biomedicines10071703), 2022-07-14
Supplement: s1 [file s1]

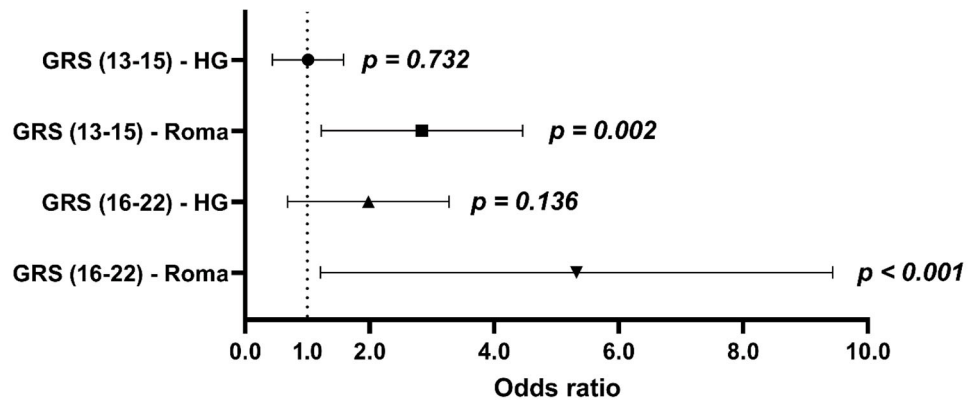

**Supplementary Figure S2.** Association of oGRS categories (low-risk group; oGRS: 7-12 was applied as reference one) with risk of insulin resistance (elevated HOMA—IR: > 3.63) as a binary outcome in the Hungarian general and Roma populations. The association was evaluated by using adjusted multinominal logistic regression models. Bonferroni corrected  $p$  value: 0.0033.
